# Supplementary material for: Study to explore the mechanism to form inclusion complexes of β-cyclodextrin with vitamin molecules
Source: PubMed Central journal article supplement (PMC5071908; doi:10.1038/srep35764), 2016-10-20
Supplement: srep35764-s1.pdf [file srep35764-s1.pdf]

## Supporting Information

# Study to explore the mechanism to form inclusion complexes of $\beta$ -cyclodextrin with vitamin molecules

Subhadeep Saha, Aditi Roy, Kanak Roy & Mahendra Nath Roy

Department of Chemistry, University of North Bengal, Darjeeling-734013, India

E-mail: *mahendraroy2002@yahoo.co.in*

### Tables:

**Table S1 Data for the Job plot performed by UV-Vis spectroscopy for aqueous nicotinic acid- $\beta$ -CD system at 298.15K<sup>a</sup>**

| Nicotinic acid (mL) | $\beta$ -CD (mL) | Nicotinic acid ( $\mu$ M) | $\beta$ -CD ( $\mu$ M) | $[NA]/([NA]+[\beta\text{-CD}])$ | Absorbance (A) | $\Delta A$ | $\Delta A \times [NA]/([NA]+[\beta\text{-CD}])$ |
|---------------------|------------------|---------------------------|------------------------|---------------------------------|----------------|------------|-------------------------------------------------|
| 0.0                 | 1.0              | 0                         | 100                    | 0.0                             | 0.0000         | 0.3625     | 0.0000                                          |
| 0.1                 | 0.9              | 10                        | 90                     | 0.1                             | 0.0357         | 0.3268     | 0.0327                                          |
| 0.2                 | 0.8              | 20                        | 80                     | 0.2                             | 0.0664         | 0.2961     | 0.0592                                          |
| 0.3                 | 0.7              | 30                        | 70                     | 0.3                             | 0.1022         | 0.2602     | 0.0781                                          |
| 0.4                 | 0.6              | 40                        | 60                     | 0.4                             | 0.1369         | 0.2256     | 0.0902                                          |
| 0.5                 | 0.5              | 50                        | 50                     | 0.5                             | 0.1681         | 0.1944     | 0.0972                                          |
| 0.6                 | 0.4              | 60                        | 40                     | 0.6                             | 0.2044         | 0.1581     | 0.0948                                          |
| 0.7                 | 0.3              | 70                        | 30                     | 0.7                             | 0.2421         | 0.1204     | 0.0842                                          |
| 0.8                 | 0.2              | 80                        | 20                     | 0.8                             | 0.2828         | 0.0797     | 0.0638                                          |
| 0.9                 | 0.1              | 90                        | 10                     | 0.9                             | 0.3233         | 0.0392     | 0.0353                                          |
| 1.0                 | 0.0              | 100                       | 0                      | 1.0                             | 0.3625         | 0.0000     | 0.0000                                          |

<sup>a</sup> Standard uncertainties in temperature  $u$  are:  $u(T) = \pm 0.01$  K.

**Table S2 Data for the Job plot performed by UV-Vis spectroscopy for aqueous ascorbic acid- $\beta$ -CD system at 298.15K<sup>a</sup>**

| Ascorbic acid (mL) | $\beta$ -CD (mL) | Ascorbic acid ( $\mu$ M) | $\beta$ -CD ( $\mu$ M) | $[AA]/([AA]+[\beta\text{-CD}])$ | Absorbance (A) | $\Delta A$ | $\Delta A \times [AA]/([AA]+[\beta\text{-CD}])$ |
|--------------------|------------------|--------------------------|------------------------|---------------------------------|----------------|------------|-------------------------------------------------|
| 0.0                | 1.0              | 0                        | 100                    | 0.0                             | 0.0000         | 0.6877     | 0.0000                                          |
| 0.1                | 0.9              | 10                       | 90                     | 0.1                             | 0.1489         | 0.5388     | 0.0539                                          |

|     |     |     |    |     |        |        |        |
|-----|-----|-----|----|-----|--------|--------|--------|
| 0.2 | 0.8 | 20  | 80 | 0.2 | 0.2460 | 0.4417 | 0.0883 |
| 0.3 | 0.7 | 30  | 70 | 0.3 | 0.2935 | 0.3942 | 0.1182 |
| 0.4 | 0.6 | 40  | 60 | 0.4 | 0.3587 | 0.3290 | 0.1316 |
| 0.5 | 0.5 | 50  | 50 | 0.5 | 0.4134 | 0.2743 | 0.1371 |
| 0.6 | 0.4 | 60  | 40 | 0.6 | 0.4737 | 0.2139 | 0.1284 |
| 0.7 | 0.3 | 70  | 30 | 0.7 | 0.5268 | 0.1609 | 0.1126 |
| 0.8 | 0.2 | 80  | 20 | 0.8 | 0.5811 | 0.1066 | 0.0853 |
| 0.9 | 0.1 | 90  | 10 | 0.9 | 0.6333 | 0.0543 | 0.0489 |
| 1.0 | 0.0 | 100 | 0  | 1.0 | 0.6877 | 0.0000 | 0.0000 |

<sup>a</sup> Standard uncertainties in temperature  $u$  are:  $u(T) = \pm 0.01$  K.

**Table S3 Data for surface tension, conductivity and pH study of aqueous nicotinic acid- $\beta$ -CD system at 298.15K<sup>a</sup>**

| Volm of $\beta$ -CD (mL) | Total volm (mL) | Conc of Nicotinic acid (mM) | Conc of $\beta$ -CD (mM) | Surface tension (mN m <sup>-1</sup> ) | Conductivity (mS m <sup>-1</sup> ) | pH    |
|--------------------------|-----------------|-----------------------------|--------------------------|---------------------------------------|------------------------------------|-------|
| 0                        | 10              | 10.000                      | 0.000                    | 82.0                                  | 8.81                               | 3.349 |
| 1                        | 11              | 9.091                       | 0.909                    | 80.5                                  | 8.10                               | 3.359 |
| 2                        | 12              | 8.333                       | 1.667                    | 79.0                                  | 7.55                               | 3.367 |
| 3                        | 13              | 7.692                       | 2.308                    | 77.8                                  | 7.13                               | 3.377 |
| 4                        | 14              | 7.143                       | 2.857                    | 76.7                                  | 6.75                               | 3.385 |
| 5                        | 15              | 6.667                       | 3.333                    | 75.8                                  | 6.41                               | 3.393 |
| 6                        | 16              | 6.250                       | 3.750                    | 75.0                                  | 6.10                               | 3.401 |
| 7                        | 17              | 5.882                       | 4.118                    | 74.3                                  | 5.85                               | 3.409 |
| 8                        | 18              | 5.556                       | 4.444                    | 73.7                                  | 5.65                               | 3.416 |
| 9                        | 19              | 5.263                       | 4.737                    | 73.3                                  | 5.49                               | 3.423 |
| 10                       | 20              | 5.000                       | 5.000                    | 73.0                                  | 5.39                               | 3.428 |
| 11                       | 21              | 4.762                       | 5.238                    | 72.9                                  | 5.32                               | 3.432 |
| 12                       | 22              | 4.545                       | 5.455                    | 72.7                                  | 5.29                               | 3.436 |
| 13                       | 23              | 4.348                       | 5.652                    | 72.6                                  | 5.26                               | 3.440 |
| 14                       | 24              | 4.167                       | 5.833                    | 72.5                                  | 5.22                               | 3.442 |
| 15                       | 25              | 4.000                       | 6.000                    | 72.4                                  | 5.19                               | 3.445 |
| 16                       | 26              | 3.846                       | 6.154                    | 72.3                                  | 5.17                               | 3.447 |
| 17                       | 27              | 3.704                       | 6.296                    | 72.2                                  | 5.14                               | 3.450 |

|    |    |       |       |      |      |       |
|----|----|-------|-------|------|------|-------|
| 18 | 28 | 3.571 | 6.429 | 72.1 | 5.11 | 3.453 |
| 19 | 29 | 3.448 | 6.552 | 72.1 | 5.08 | 3.455 |
| 20 | 30 | 3.333 | 6.667 | 72.0 | 5.06 | 3.458 |

<sup>a</sup> Standard uncertainties in temperature  $u$  are:  $u(T) = \pm 0.01$  K.

**Table S4 Data for surface tension, conductivity and pH study of aqueous ascorbic acid- $\beta$ -CD system at 298.15K<sup>a</sup>**

| Volm of $\beta$ -CD (mL) | Total volm (mL) | Conc of Ascorbic acid (mM) | Conc of $\beta$ -CD (mM) | Surface tension (mN m <sup>-1</sup> ) | Conductivity (mS m <sup>-1</sup> ) | pH    |
|--------------------------|-----------------|----------------------------|--------------------------|---------------------------------------|------------------------------------|-------|
| 0                        | 10              | 10.000                     | 0.000                    | 82.5                                  | 18.85                              | 2.916 |
| 1                        | 11              | 9.091                      | 0.909                    | 80.5                                  | 17.25                              | 2.921 |
| 2                        | 12              | 8.333                      | 1.667                    | 79.0                                  | 15.94                              | 2.935 |
| 3                        | 13              | 7.692                      | 2.308                    | 77.9                                  | 14.90                              | 2.955 |
| 4                        | 14              | 7.143                      | 2.857                    | 76.9                                  | 14.00                              | 2.970 |
| 5                        | 15              | 6.667                      | 3.333                    | 76.0                                  | 13.29                              | 2.986 |
| 6                        | 16              | 6.250                      | 3.750                    | 75.2                                  | 12.62                              | 3.002 |
| 7                        | 17              | 5.882                      | 4.118                    | 74.5                                  | 11.98                              | 3.020 |
| 8                        | 18              | 5.556                      | 4.444                    | 73.9                                  | 11.40                              | 3.031 |
| 9                        | 19              | 5.263                      | 4.737                    | 73.4                                  | 10.95                              | 3.045 |
| 10                       | 20              | 5.000                      | 5.000                    | 73.0                                  | 10.68                              | 3.056 |
| 11                       | 21              | 4.762                      | 5.238                    | 72.8                                  | 10.50                              | 3.067 |
| 12                       | 22              | 4.545                      | 5.455                    | 72.7                                  | 10.35                              | 3.081 |
| 13                       | 23              | 4.348                      | 5.652                    | 72.6                                  | 10.25                              | 3.092 |
| 14                       | 24              | 4.167                      | 5.833                    | 72.5                                  | 10.16                              | 3.104 |
| 15                       | 25              | 4.000                      | 6.000                    | 72.4                                  | 10.07                              | 3.115 |
| 16                       | 26              | 3.846                      | 6.154                    | 72.3                                  | 10.01                              | 3.123 |
| 17                       | 27              | 3.704                      | 6.296                    | 72.2                                  | 9.94                               | 3.136 |
| 18                       | 28              | 3.571                      | 6.429                    | 72.2                                  | 9.90                               | 3.145 |
| 19                       | 29              | 3.448                      | 6.552                    | 72.1                                  | 9.83                               | 3.154 |
| 20                       | 30              | 3.333                      | 6.667                    | 72.1                                  | 9.80                               | 3.162 |

<sup>a</sup> Standard uncertainties in temperature  $u$  are:  $u(T) = \pm 0.01$  K.

**Table S5 Data for the Benesi-Hildebrand double reciprocal plot performed by UV-Vis spectroscopy for aqueous nicotinic acid- $\beta$ -CD system**

| Temp<br>/K <sup>a</sup> | [NA]<br>/ $\mu$ M | [ $\beta$ -CD]<br>/ $\mu$ M | A <sub>0</sub> | A      | $\Delta A$ | 1/[ $\beta$ -CD]<br>/M <sup>-1</sup> | 1/ $\Delta A$ | Intercept | Slope     | K <sub>a</sub><br>/M <sup>-1</sup> |
|-------------------------|-------------------|-----------------------------|----------------|--------|------------|--------------------------------------|---------------|-----------|-----------|------------------------------------|
| 288.15                  | 50                | 30                          |                | 0.1793 | 0.0073     | 33333                                | 137.0         | 6.2982651 | 0.0038934 | 1617.68                            |
|                         | 50                | 40                          |                | 0.1818 | 0.0098     | 25000                                | 102.0         |           |           |                                    |
|                         | 50                | 50                          | 0.1720         | 0.1839 | 0.0119     | 20000                                | 84.0          |           |           |                                    |
|                         | 50                | 60                          |                | 0.1860 | 0.0140     | 16667                                | 71.4          |           |           |                                    |
|                         | 50                | 70                          |                | 0.1880 | 0.0160     | 14286                                | 62.5          |           |           |                                    |
| 293.15                  | 50                | 30                          |                | 0.1784 | 0.0064     | 33333                                | 156.3         | 6.2545665 | 0.0044882 | 1393.56                            |
|                         | 50                | 40                          |                | 0.1805 | 0.0085     | 25000                                | 117.6         |           |           |                                    |
|                         | 50                | 50                          | 0.1720         | 0.1824 | 0.0104     | 20000                                | 96.2          |           |           |                                    |
|                         | 50                | 60                          |                | 0.1843 | 0.0123     | 16667                                | 81.3          |           |           |                                    |
|                         | 50                | 70                          |                | 0.1862 | 0.0142     | 14286                                | 70.4          |           |           |                                    |
| 298.15                  | 50                | 30                          |                | 0.1774 | 0.0054     | 33333                                | 185.2         | 6.7025956 | 0.0053795 | 1245.95                            |
|                         | 50                | 40                          |                | 0.1790 | 0.0070     | 25000                                | 142.9         |           |           |                                    |
|                         | 50                | 50                          | 0.1720         | 0.1808 | 0.0088     | 20000                                | 113.6         |           |           |                                    |
|                         | 50                | 60                          |                | 0.1823 | 0.0103     | 16667                                | 97.1          |           |           |                                    |
|                         | 50                | 70                          |                | 0.1841 | 0.0121     | 14286                                | 82.6          |           |           |                                    |
| 303.15                  | 50                | 30                          |                | 0.1769 | 0.0049     | 33333                                | 204.1         | 6.4153885 | 0.0059772 | 1073.31                            |
|                         | 50                | 40                          |                | 0.1783 | 0.0063     | 25000                                | 158.7         |           |           |                                    |
|                         | 50                | 50                          | 0.1720         | 0.1799 | 0.0079     | 20000                                | 126.6         |           |           |                                    |
|                         | 50                | 60                          |                | 0.1816 | 0.0096     | 16667                                | 104.2         |           |           |                                    |
|                         | 50                | 70                          |                | 0.1829 | 0.0109     | 14286                                | 91.7          |           |           |                                    |
| 308.15                  | 50                | 30                          |                | 0.1762 | 0.0042     | 33333                                | 238.1         | 6.3315992 | 0.0068908 | 918.85                             |
|                         | 50                | 40                          |                | 0.1777 | 0.0057     | 25000                                | 175.4         |           |           |                                    |
|                         | 50                | 50                          | 0.1720         | 0.1790 | 0.0070     | 20000                                | 142.9         |           |           |                                    |
|                         | 50                | 60                          |                | 0.1802 | 0.0082     | 16667                                | 122.0         |           |           |                                    |
|                         | 50                | 70                          |                | 0.1814 | 0.0094     | 14286                                | 106.4         |           |           |                                    |
| 313.15                  | 50                | 30                          |                | 0.1757 | 0.0037     | 33333                                | 270.3         | 6.4667146 | 0.0078986 | 818.72                             |
|                         | 50                | 40                          |                | 0.1769 | 0.0049     | 25000                                | 204.1         |           |           |                                    |
|                         | 50                | 50                          | 0.1720         | 0.1782 | 0.0062     | 20000                                | 161.3         |           |           |                                    |
|                         | 50                | 60                          |                | 0.1791 | 0.0071     | 16667                                | 140.8         |           |           |                                    |
|                         | 50                | 70                          |                | 0.1804 | 0.0084     | 14286                                | 119.0         |           |           |                                    |

<sup>a</sup> Standard uncertainties in temperature  $u$  are:  $u(T) = \pm 0.01$  K.

**Table S6 Data for the Benesi-Hildebrand double reciprocal plot performed by UV-Vis spectroscopy for aqueous ascorbic acid- $\beta$ -CD system**

| Temp<br>/K <sup>a</sup> | [AA]<br>/ $\mu$ M | [ $\beta$ -CD]<br>/ $\mu$ M | A <sub>0</sub> | A      | $\Delta A$ | 1/[ $\beta$ -CD]<br>/M <sup>-1</sup> | 1/ $\Delta A$ | Intercept | Slope     | K <sub>a</sub><br>/M <sup>-1</sup> |
|-------------------------|-------------------|-----------------------------|----------------|--------|------------|--------------------------------------|---------------|-----------|-----------|------------------------------------|
| 288.15                  | 50                | 30                          |                | 0.4098 | 0.0078     | 33333                                | 128.2         | 14.350533 | 0.0034272 | 4187.25                            |
|                         | 50                | 40                          |                | 0.4120 | 0.0100     | 25000                                | 100.0         |           |           |                                    |
|                         | 50                | 50                          | 0.4020         | 0.4139 | 0.0119     | 20000                                | 84.0          |           |           |                                    |
|                         | 50                | 60                          |                | 0.4159 | 0.0139     | 16667                                | 71.9          |           |           |                                    |
|                         | 50                | 70                          |                | 0.4181 | 0.0161     | 14286                                | 62.1          |           |           |                                    |
| 293.15                  | 50                | 30                          |                | 0.4088 | 0.0068     | 33333                                | 147.1         | 14.545396 | 0.0040579 | 3584.46                            |
|                         | 50                | 40                          |                | 0.4103 | 0.0083     | 25000                                | 120.5         |           |           |                                    |
|                         | 50                | 50                          | 0.4020         | 0.4123 | 0.0103     | 20000                                | 97.1          |           |           |                                    |
|                         | 50                | 60                          |                | 0.4144 | 0.0124     | 16667                                | 80.6          |           |           |                                    |
|                         | 50                | 70                          |                | 0.4161 | 0.0141     | 14286                                | 70.9          |           |           |                                    |
| 298.15                  | 50                | 30                          |                | 0.4078 | 0.0058     | 33333                                | 172.4         | 14.671623 | 0.0047343 | 3099.01                            |
|                         | 50                | 40                          |                | 0.4095 | 0.0075     | 25000                                | 133.3         |           |           |                                    |
|                         | 50                | 50                          | 0.4020         | 0.4112 | 0.0092     | 20000                                | 108.7         |           |           |                                    |
|                         | 50                | 60                          |                | 0.4126 | 0.0106     | 16667                                | 94.3          |           |           |                                    |
|                         | 50                | 70                          |                | 0.4142 | 0.0122     | 14286                                | 82.0          |           |           |                                    |
| 303.15                  | 50                | 30                          |                | 0.4071 | 0.0051     | 33333                                | 196.1         | 14.632896 | 0.005469  | 2675.61                            |
|                         | 50                | 40                          |                | 0.4085 | 0.0065     | 25000                                | 153.8         |           |           |                                    |
|                         | 50                | 50                          | 0.4020         | 0.4102 | 0.0082     | 20000                                | 122.0         |           |           |                                    |
|                         | 50                | 60                          |                | 0.4114 | 0.0094     | 16667                                | 106.4         |           |           |                                    |
|                         | 50                | 70                          |                | 0.4128 | 0.0108     | 14286                                | 92.6          |           |           |                                    |
| 308.15                  | 50                | 30                          |                | 0.4065 | 0.0045     | 33333                                | 222.2         | 14.83579  | 0.0063582 | 2333.33                            |
|                         | 50                | 40                          |                | 0.4075 | 0.0055     | 25000                                | 181.8         |           |           |                                    |
|                         | 50                | 50                          | 0.4020         | 0.4090 | 0.0070     | 20000                                | 142.9         |           |           |                                    |
|                         | 50                | 60                          |                | 0.4104 | 0.0084     | 16667                                | 119.0         |           |           |                                    |
|                         | 50                | 70                          |                | 0.4117 | 0.0097     | 14286                                | 103.1         |           |           |                                    |
| 313.15                  | 50                | 30                          |                | 0.4057 | 0.0037     | 33333                                | 270.3         | 15.638863 | 0.0077024 | 2030.39                            |
|                         | 50                | 40                          |                | 0.4067 | 0.0047     | 25000                                | 212.8         |           |           |                                    |
|                         | 50                | 50                          | 0.4020         | 0.4079 | 0.0059     | 20000                                | 169.5         |           |           |                                    |
|                         | 50                | 60                          |                | 0.4091 | 0.0071     | 16667                                | 140.8         |           |           |                                    |
|                         | 50                | 70                          |                | 0.4099 | 0.0079     | 14286                                | 126.6         |           |           |                                    |

<sup>a</sup> Standard uncertainties in temperature  $u$  are:  $u(T) = \pm 0.01$  K.

**Table S7 Data of the van't Hoff equation for calculation of thermodynamic parameters  $\Delta H^\circ$  and  $\Delta S^\circ$  of different vitamin- $\beta$ -cyclodextrin inclusion complexes**

|                | Temp<br>/K <sup>a</sup> | K <sub>a</sub><br>/M <sup>-1</sup> | 1/T     | lnK <sub>a</sub> | Intercept | Slope   | $\Delta H^\circ$<br>/kJ mol <sup>-1</sup> | $\Delta S^\circ$<br>/J mol <sup>-1</sup> K <sup>-1</sup> |
|----------------|-------------------------|------------------------------------|---------|------------------|-----------|---------|-------------------------------------------|----------------------------------------------------------|
| Nicotinic acid | 288.15                  | 1618                               | 0.00347 | 7.3887           | -1.1985   | 2476.18 | -20.59                                    | -9.96                                                    |
|                | 293.15                  | 1394                               | 0.00341 | 7.2396           |           |         |                                           |                                                          |
|                | 298.15                  | 1246                               | 0.00335 | 7.1277           |           |         |                                           |                                                          |
|                | 303.15                  | 1073                               | 0.00330 | 6.9785           |           |         |                                           |                                                          |
|                | 308.15                  | 919                                | 0.00325 | 6.8231           |           |         |                                           |                                                          |
|                | 313.15                  | 819                                | 0.00319 | 6.7077           |           |         |                                           |                                                          |
| Ascorbic acid  | 288.15                  | 4187                               | 0.00347 | 8.3398           | -0.7058   | 2606.59 | -21.67                                    | -5.87                                                    |
|                | 293.15                  | 3584                               | 0.00341 | 8.1844           |           |         |                                           |                                                          |
|                | 298.15                  | 3099                               | 0.00335 | 8.0388           |           |         |                                           |                                                          |
|                | 303.15                  | 2676                               | 0.00330 | 7.8919           |           |         |                                           |                                                          |
|                | 308.15                  | 2333                               | 0.00325 | 7.7551           |           |         |                                           |                                                          |
|                | 313.15                  | 2030                               | 0.00319 | 7.6160           |           |         |                                           |                                                          |

<sup>a</sup> Standard uncertainties in temperature  $u$  are:  $u(T) = \pm 0.01$  K.

**Table S8 Data of the van't Hoff equation for calculation of thermodynamic parameters  $\Delta H^{\circ\Psi}$  and  $\Delta S^{\circ\Psi}$  of different vitamin- $\beta$ -cyclodextrin inclusion complexes**

|                | Temp<br>/K <sup>a</sup> | K <sub>a</sub> <sup>Ψ</sup><br>/M <sup>-1</sup> | 1/T     | lnK <sub>a</sub> <sup>Ψ</sup> | Intercept | Slope   | $\Delta H^{\circ\Psi}$<br>/kJ mol <sup>-1</sup> | $\Delta S^{\circ\Psi}$<br>/J mol <sup>-1</sup> K <sup>-1</sup> |
|----------------|-------------------------|-------------------------------------------------|---------|-------------------------------|-----------|---------|-------------------------------------------------|----------------------------------------------------------------|
| Nicotinic acid | 288.15                  | 1655                                            | 0.00347 | 7.412                         | -1.4704   | 2559.29 | -21.28                                          | -12.23                                                         |
|                | 293.15                  | 1425                                            | 0.00341 | 7.262                         |           |         |                                                 |                                                                |
|                | 298.15                  | 1229                                            | 0.00335 | 7.114                         |           |         |                                                 |                                                                |
|                | 303.15                  | 1059                                            | 0.00330 | 6.965                         |           |         |                                                 |                                                                |
|                | 308.15                  | 933                                             | 0.00325 | 6.838                         |           |         |                                                 |                                                                |
|                | 313.15                  | 815                                             | 0.00319 | 6.703                         |           |         |                                                 |                                                                |
| Ascorbic acid  | 288.15                  | 4209                                            | 0.00347 | 8.345                         | -0.7695   | 2625.40 | -21.83                                          | -6.40                                                          |
|                | 293.15                  | 3612                                            | 0.00341 | 8.192                         |           |         |                                                 |                                                                |
|                | 298.15                  | 3061                                            | 0.00335 | 8.026                         |           |         |                                                 |                                                                |
|                | 303.15                  | 2644                                            | 0.00330 | 7.880                         |           |         |                                                 |                                                                |
|                | 308.15                  | 2349                                            | 0.00325 | 7.762                         |           |         |                                                 |                                                                |
|                | 313.15                  | 2028                                            | 0.00319 | 7.615                         |           |         |                                                 |                                                                |

<sup>a</sup> Standard uncertainties in temperature  $u$  are:  $u(T) = \pm 0.01$  K.

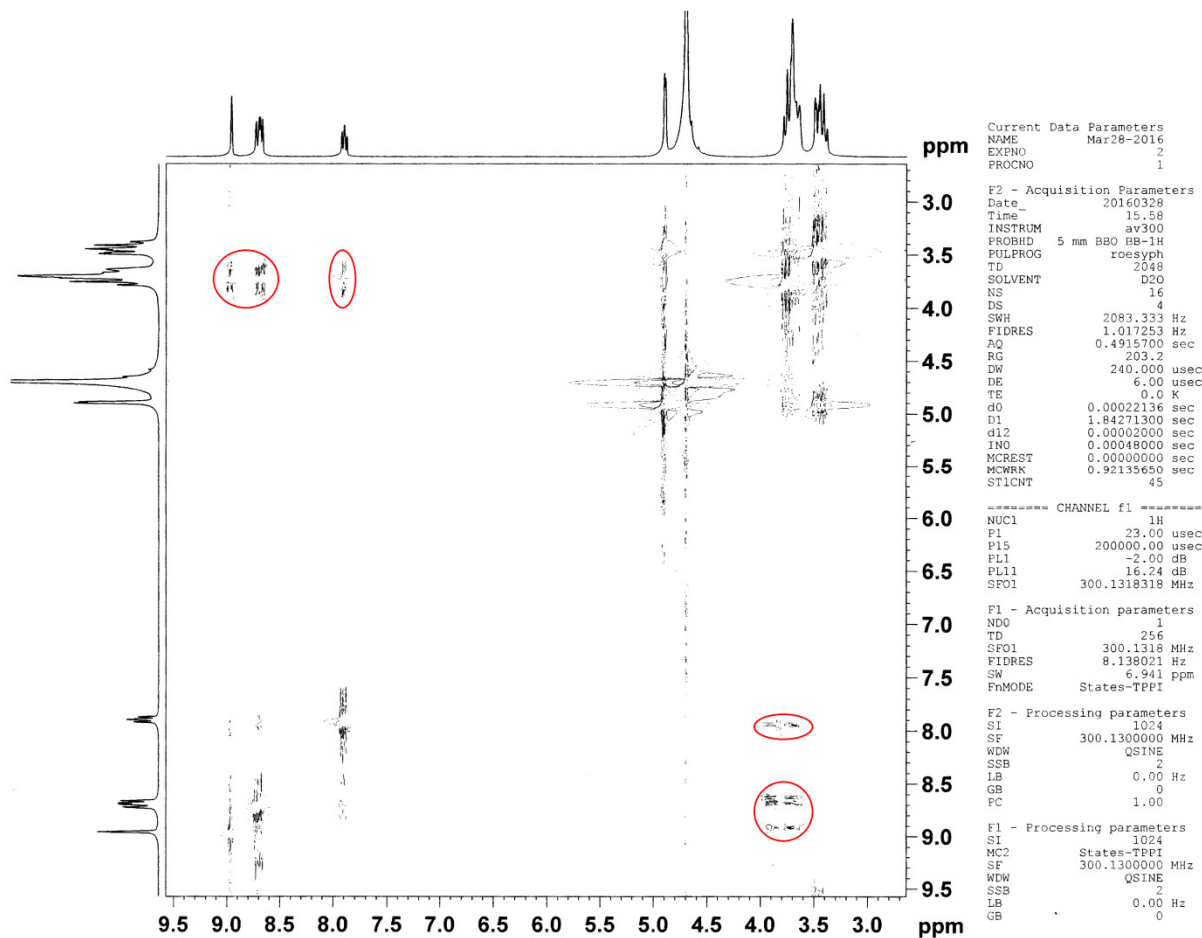

**Fig S1.** 2D ROESY spectra of 1:1 molar ratio of  $\beta$ -CD and nicotinic acid in  $D_2O$ . Red circles showing the correlation signals.

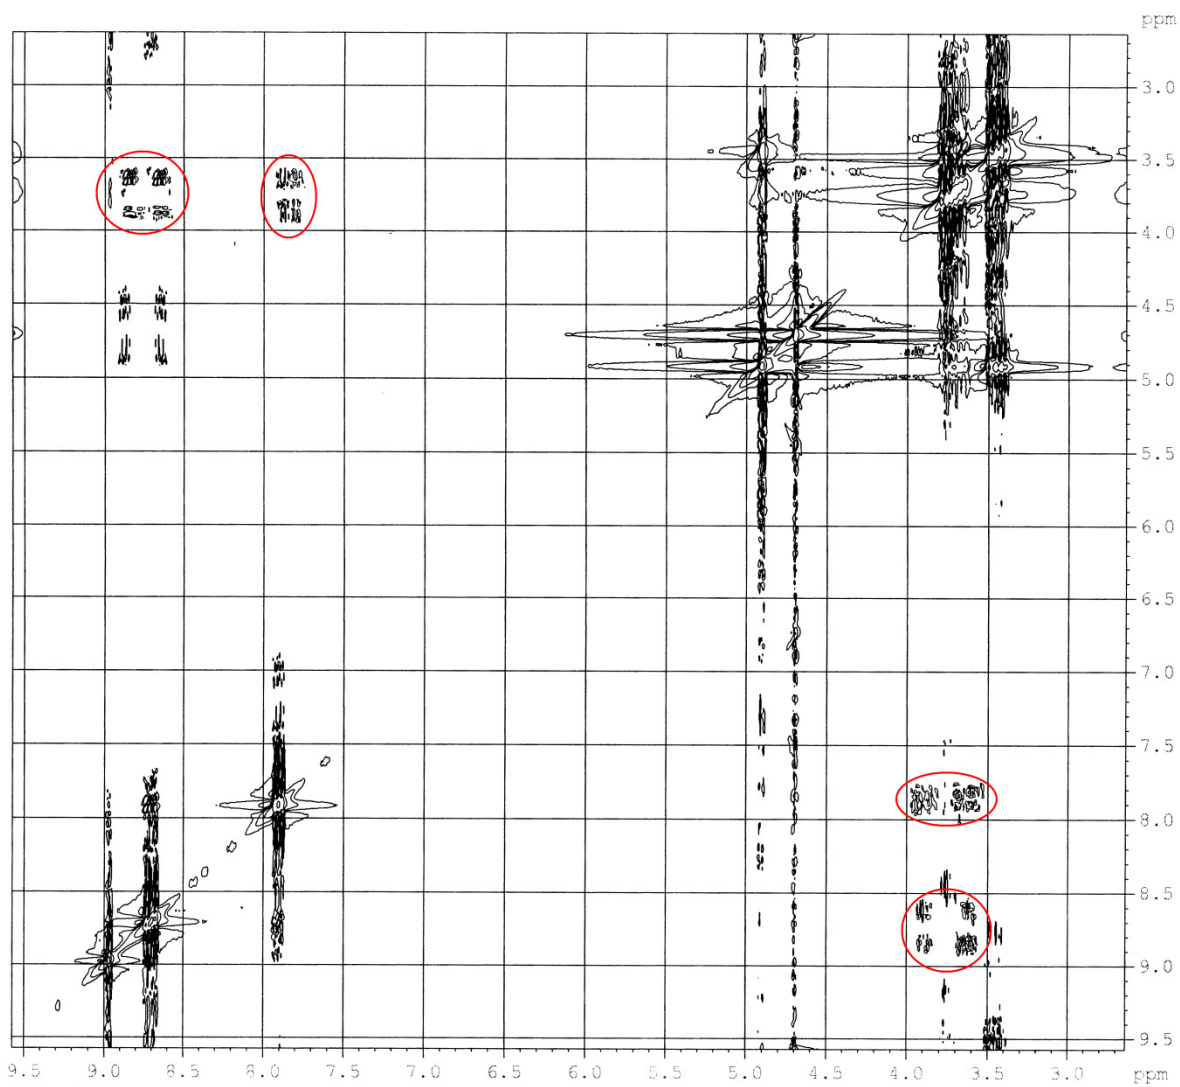

**Fig S2.** 2D ROESY spectra of 1:1 molar ratio of  $\beta$ -CD and nicotinic acid in  $D_2O$ . Red circles showing the correlation signals.



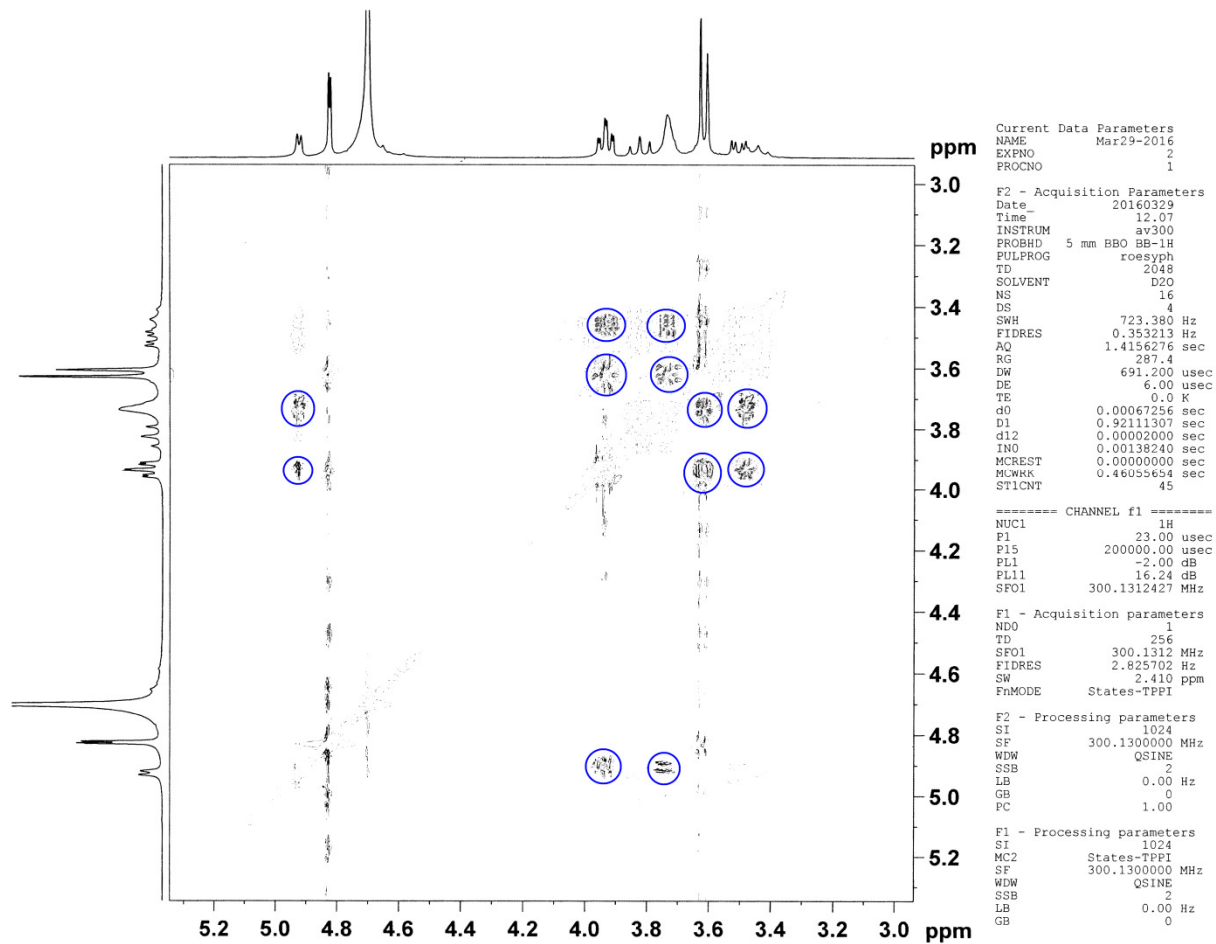

**Fig S3.** 2D ROESY spectra of 1:1 molar ratio of  $\beta$ -CD and ascorbic acid in  $D_2O$ . Blue circles showing the correlation signals.

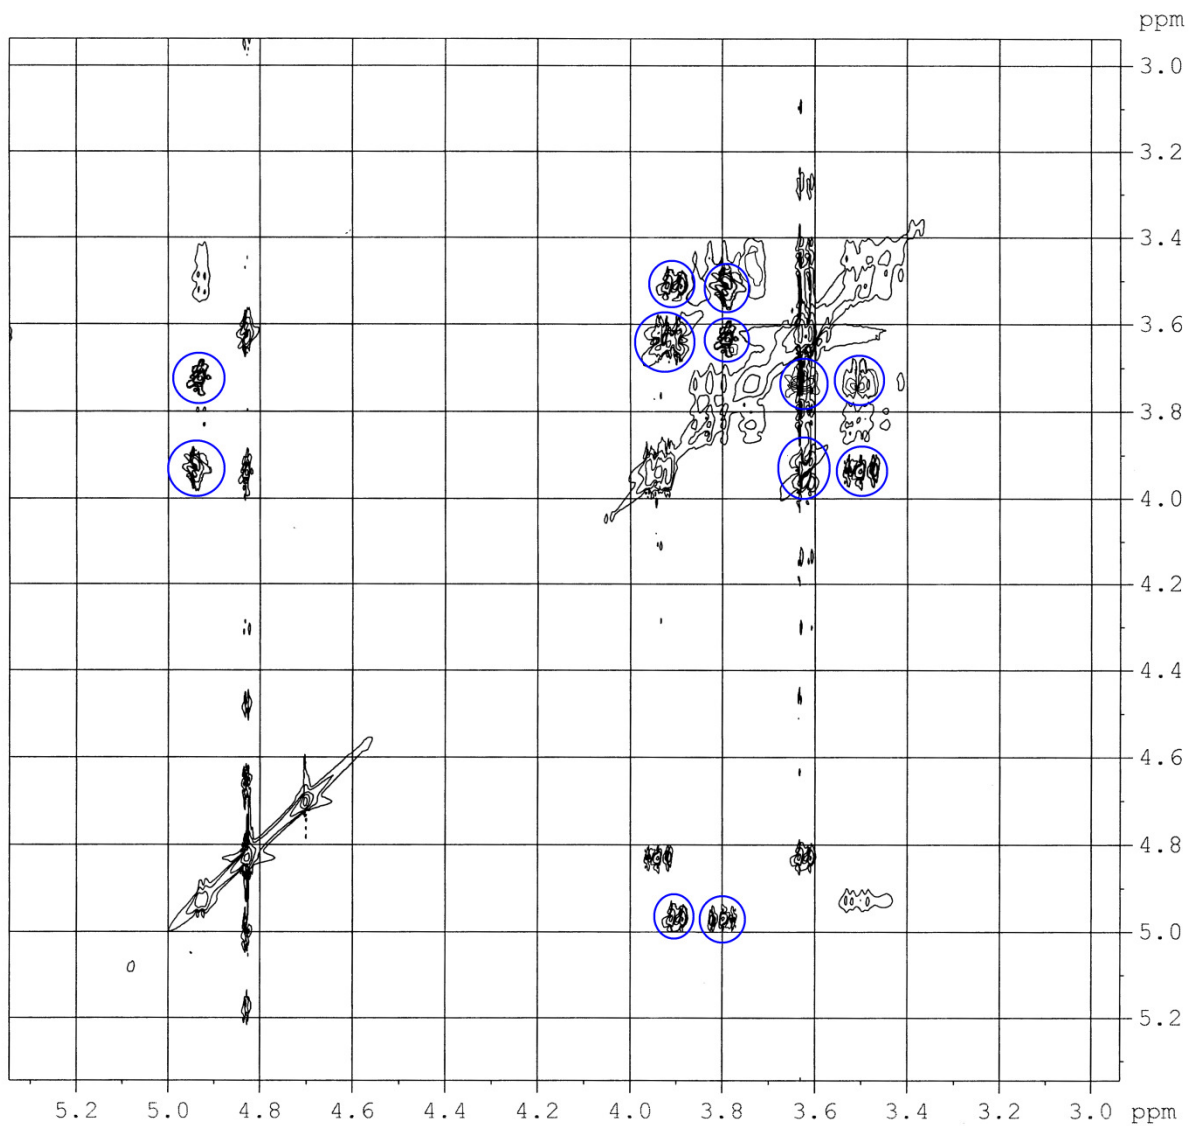

**Fig S4.** 2D ROESY spectra of 1:1 molar ratio of  $\beta$ -CD and ascorbic acid in  $D_2O$ . Blue circles showing the correlation signals.

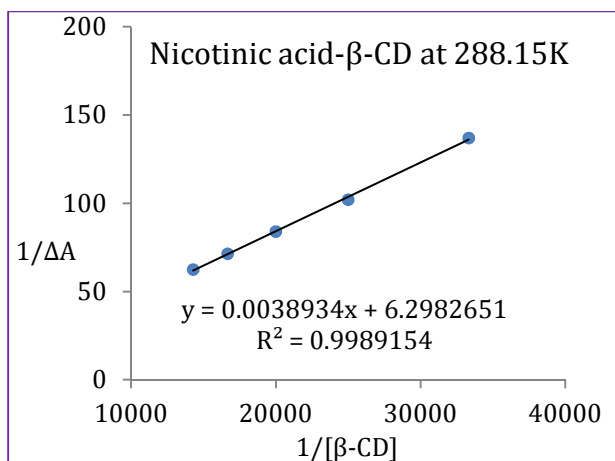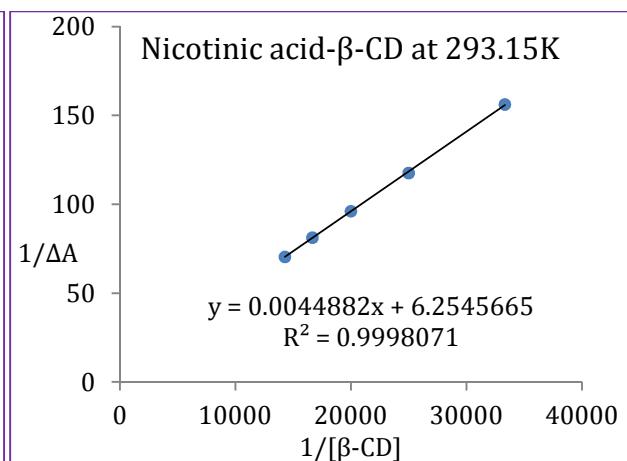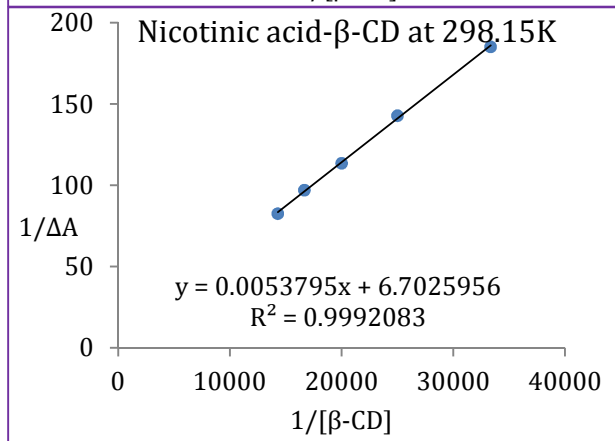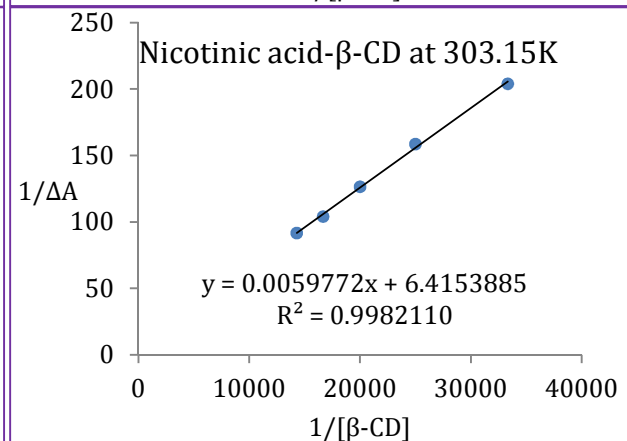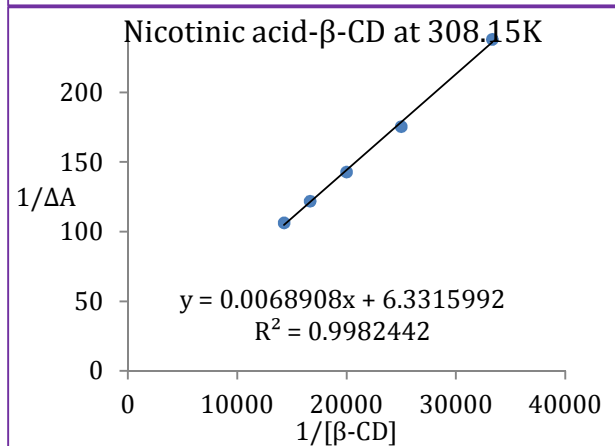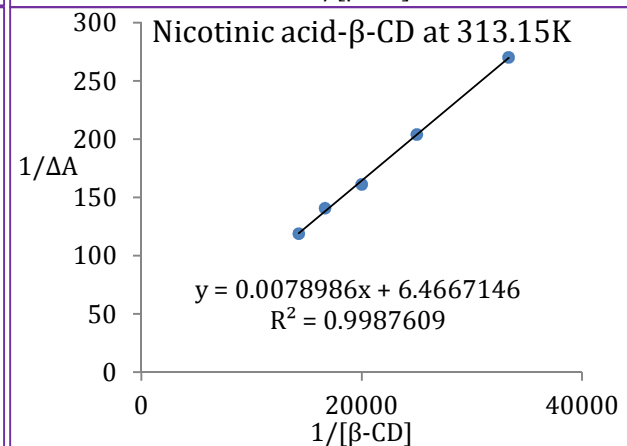

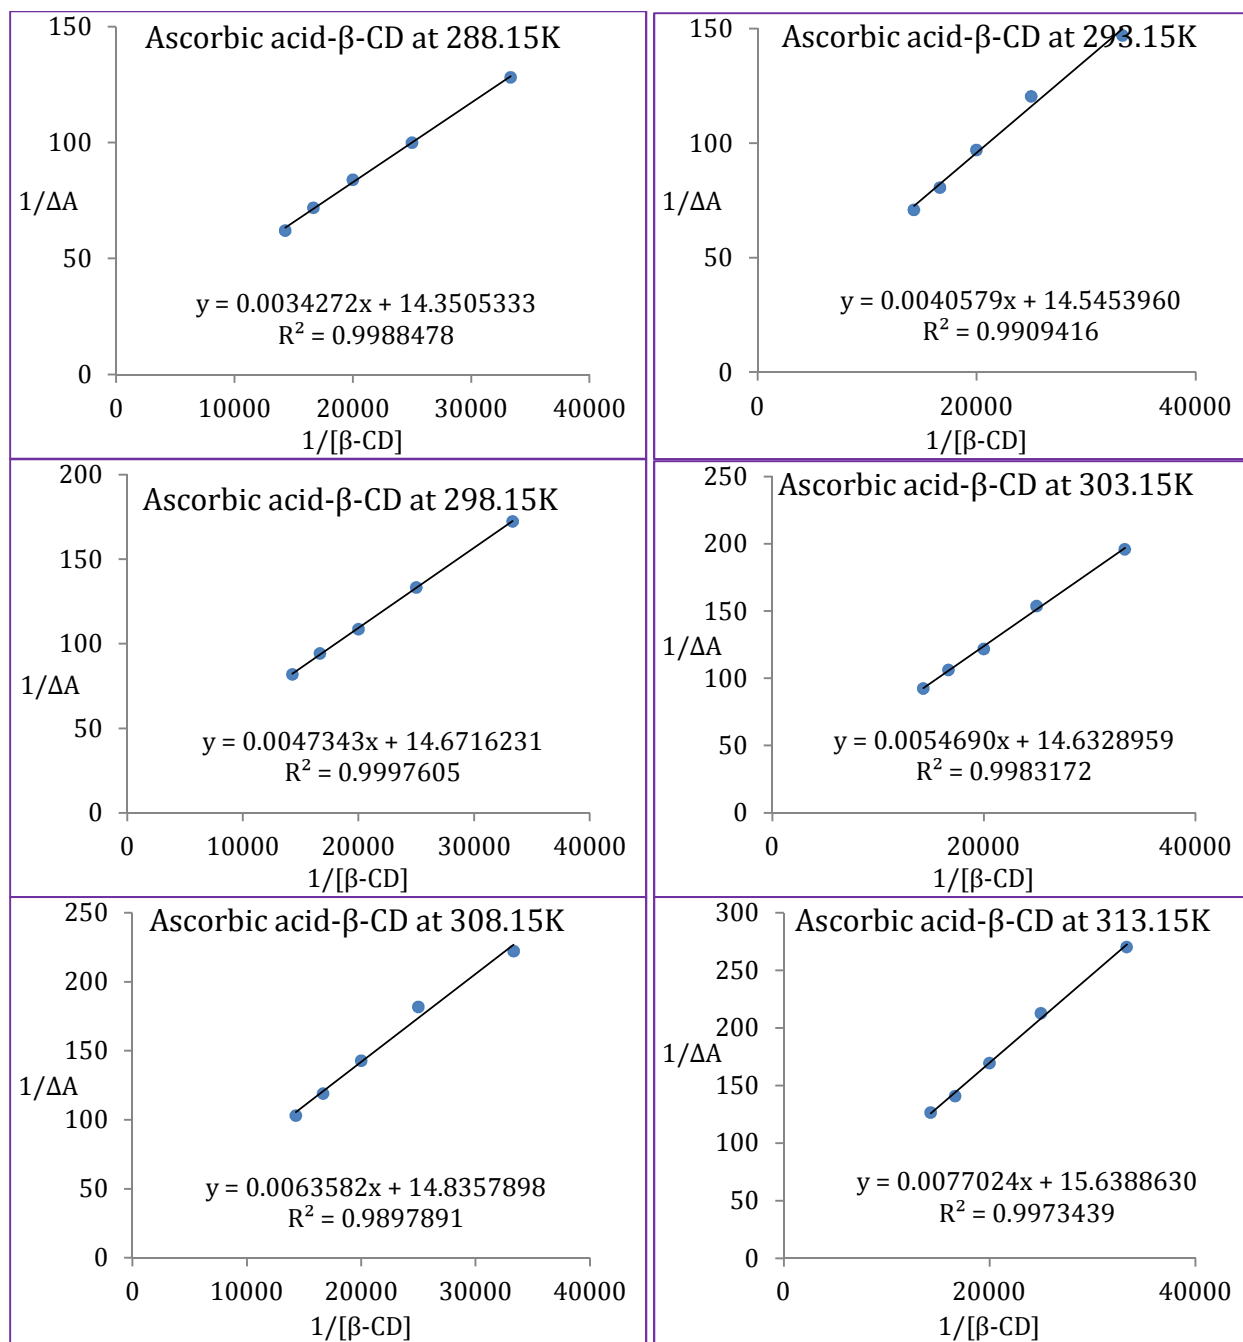

**Fig S5.** Benesi-Hildebrand double reciprocal plot for the effect of  $\beta$ -CD on the absorbance of nicotinic acid (260 nm) and ascorbic acid (261 to 265 nm) at different temperatures.

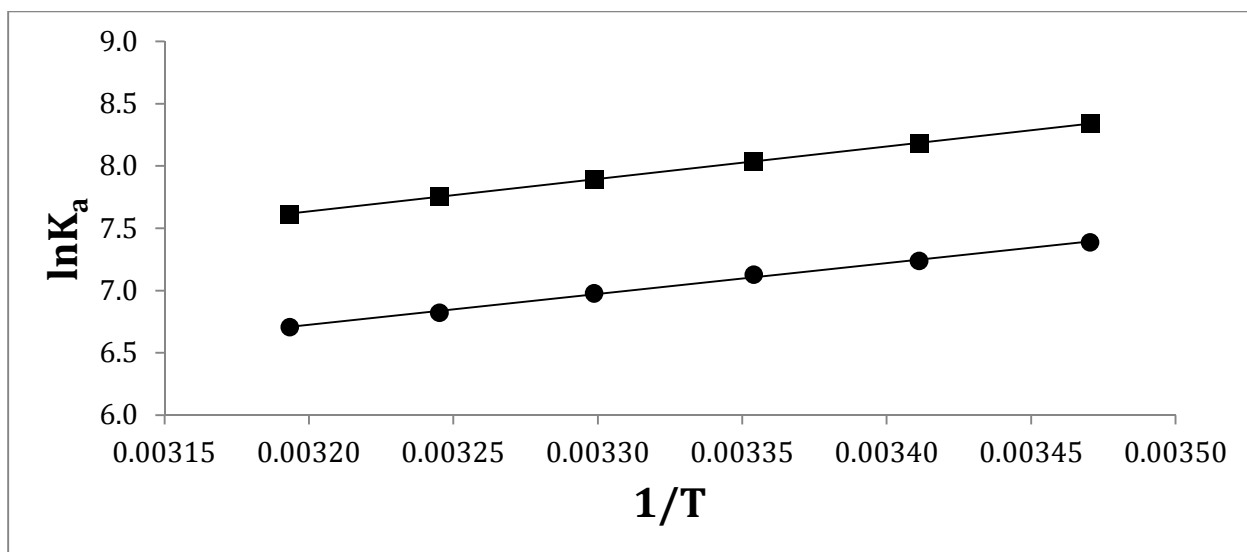

**Fig S6.** Plot of  $\ln K_a$  vs  $1/T$  for the interaction between nicotinic acid (●) and ascorbic acid (■) with  $\beta$ -CD.

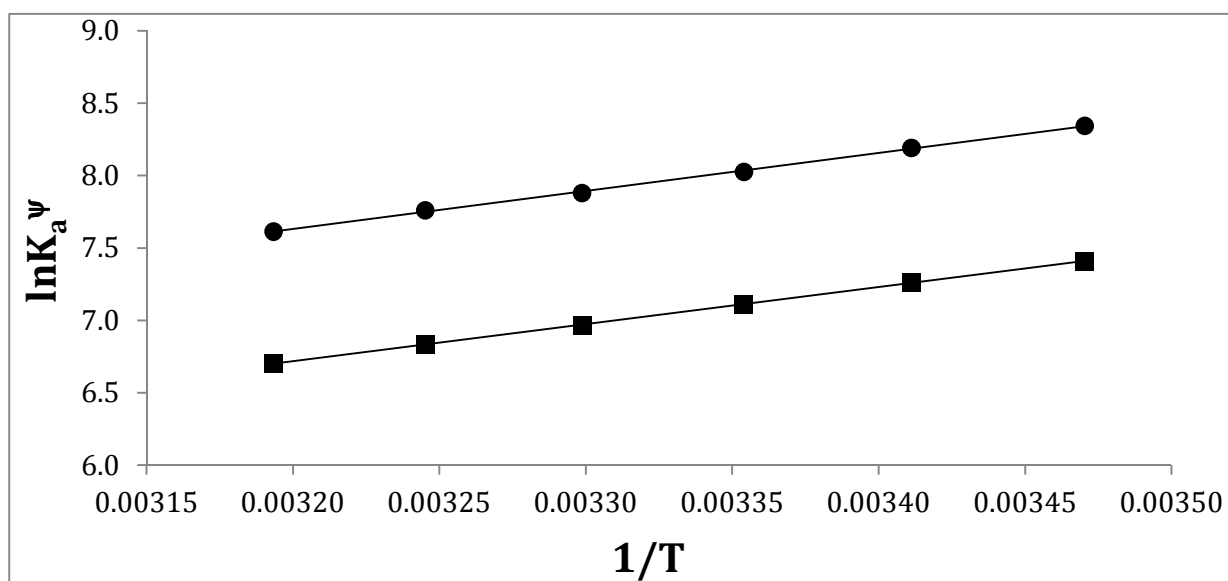

**Fig S7.** Plot of  $\ln K_a^\psi$  vs  $1/T$  for the interaction between nicotinic acid (■) and ascorbic acid (●) with  $\beta$ -CD.
